# Supplementary material
Source: PubMed Central journal article supplement (PMC4335902)
Supplement: AAC.04433-14_zac002153684so1.pdf [file AAC.04433-14_zac002153684so1.pdf]

## Supplementary data

**Suppl. Table 1** Clinical isolates analyzed in this study

| Strain Name | Ribo-type | Strain Source | [TcdA] in culture (ng/ml) | [TcdB] in culture (ng/ml) | Actox EC <sub>50</sub> (ng/ml) | Bezlotox EC <sub>50</sub> (ng/ml) | Actox % max inh. | Bezlotox % max inh. |
|-------------|-----------|---------------|---------------------------|---------------------------|--------------------------------|-----------------------------------|------------------|---------------------|
| M106        | 001       | Gerding       | 1                         | 6                         | TTL <sup>a</sup>               | 7.1                               | N/D              | 100                 |
| M147        | 001       | Gerding       | 30                        | 3                         | 91                             | 8.5                               | 77               | 96                  |
| M186        | 001       | Gerding       | 122                       | 12                        | 78                             | 9.9                               | 96               | 95                  |
| 05A07CD0025 | 001       | Miller        | 210                       | 19                        | 85                             | 8.9                               | 93               | 103                 |
| 03A09CD0010 | 001       | Miller        | 265                       | 25                        | 101                            | 9.7                               | 84               | 98                  |
| 08ACD0012   | 001       | Miller        | 305                       | 20                        | 82                             | 10                                | 91               | 98                  |
| 15ACD0027   | 001       | Miller        | 236                       | 22                        | 101                            | 10.2                              | 90               | 106                 |
| 140         | 001       | TGC           | 183                       | 10                        | 112                            | 11.8                              | 107              | 97                  |
| 41          | 001       | TGC           | 484                       | 41                        | 106                            | 9.1                               | 95               | 85                  |
| M027        | 002       | Gerding       | 121                       | 7                         | 35.5                           | 6.4                               | 92               | 103                 |
| 26ACD0042   | 002       | Miller        | 305                       | 60                        | 201                            | 17                                | 99               | 100                 |
| 48          | 002       | TGC           | 525                       | 42                        | 275                            | 4.4                               | 96               | 101                 |
| 7           | 003       | Wilcox        | 556                       | 12                        | 84                             | 20                                | 103              | 99                  |
| 8           | 003       | Wilcox        | 592                       | 11                        | 88                             | 11                                | 101              | 89                  |
| 04ACD0004   | 003       | Miller        | 360                       | 18                        | 140                            | 1.9                               | 107              | 106                 |
| 121         | 012       | TGC           | 45                        | 2                         | 72                             | 6.8                               | 79               | 106                 |
| 128         | 012       | TGC           | 111                       | 8                         | 45                             | 10                                | 81               | 102                 |
| 17          | 012       | Wilcox        | 14                        | 1                         | TTL                            | 32                                | TTL              | 89                  |
| 18          | 012       | Wilcox        | 11                        | 1                         | TTL                            | 7.4                               | TTL              | 105                 |
| 158         | 017       | TGC           | BLOQ <sup>c</sup>         | 32                        | TTL                            | 1.1                               | TTL              | 104                 |
| 52          | 017       | TGC           | BLOQ                      | 49                        | TTL                            | 0.8                               | TTL              | 104                 |
| 25          | 017       | Wilcox        | BLOQ                      | 74                        | TTL                            | 1.9                               | TTL              | 116                 |
| 26          | 017       | Wilcox        | BLOQ                      | 56                        | TTL                            | 1.6                               | TTL              | 101                 |
| 138         | 023       | TGC           | 13                        | 4                         | TTL                            | 20                                | TTL              | 88                  |
| 160         | 023       | TGC           | 19                        | 2                         | TTL                            | 23                                | TTL              | 95                  |
| BI17        | 027       | Gerding       | N/D <sup>b</sup>          | N/D                       | 3690                           | 212                               | 104              | 92                  |
| BI6         | 027       | Gerding       | N/D                       | N/D                       | 9230                           | 222                               | 103              | 82                  |
| M041        | 027       | Gerding       | 697                       | 231                       | 3310                           | 380                               | 92               | 85                  |
| M125        | 027       | Gerding       | 70                        | 28                        | 3420                           | 251                               | 81               | 95                  |
| 01A07CD0051 | 027       | Miller        | 512                       | 758                       | 2970                           | 254                               | 77               | 96                  |
| 01A07CD0001 | 027       | Miller        | 555                       | 922                       | 2580                           | 374                               | 67               | 98                  |
| 15A07CD0002 | 027       | Miller        | 848                       | 1591                      | 3180                           | 582                               | 86               | 89                  |
| 20ACD0009   | 027       | Miller        | 902                       | 1186                      | N/D                            | 242                               | N/D              | 89                  |
| 04ACD0081   | 027       | Miller        | 503                       | 579                       | N/D                            | 609                               | N/D              | 88                  |
| 19A08CD0009 | 027       | Miller        | 868                       | 1199                      | N/D                            | 190                               | N/D              | 89                  |
| 11A09CD0045 | 027       | Miller        | 285                       | 299                       | N/D                            | 220                               | N/D              | 85                  |
| 07B09CD0002 | 027       | Miller        | 712                       | 1415                      | 6630                           | 717                               | 101              | 92                  |
| 14A10CD0012 | 027       | Miller        | 288                       | 397                       | N/D                            | 221                               | N/D              | 80                  |
| 07ACD0110   | 027       | Miller        | 1319                      | 1955                      | 3050                           | 561                               | 80               | 92                  |
| 33          | 027       | TGC           | 116                       | 54                        | 2680                           | 558                               | 79               | 80                  |
| 89          | 027       | TGC           | 339                       | 197                       | 2500                           | 323                               | 91               | 81                  |

|                    |     |         |      |     |      |     |     |     |
|--------------------|-----|---------|------|-----|------|-----|-----|-----|
| 40                 | 027 | Wilcox  | 1002 | 383 | 3660 | 176 | 98  | 88  |
| 41                 | 027 | Wilcox  | 1086 | 552 | 3370 | 378 | 90  | 90  |
| M137               | 053 | Gerding | 386  | 17  | 68   | 5.6 | 101 | 99  |
| 58                 | 063 | Wilcox  | 34   | 6   | N/D  | 24  | N/D | 90  |
| 59                 | 063 | Wilcox  | 44   | 7   | N/D  | 17  | N/D | 90  |
| M129               | 077 | Gerding | 246  | 7   | 141  | 7.7 | 99  | 99  |
| M196               | 077 | Gerding | 21   | 4   | 80   | 26  | 74  | 98  |
| M220               | 078 | Gerding | 392  | 37  | 2590 | 183 | 72  | 96  |
| 26B10CD0003        | 078 | Miller  | 216  | 68  | 3600 | 134 | 80  | 94  |
| 09A10CD0018        | 078 | Miller  | 204  | 48  | 2160 | 180 | 77  | 95  |
| 169                | 078 | TGC     | 1164 | 218 | 3580 | 67  | 72  | 96  |
| 73                 | 078 | TGC     | 240  | 38  | 3000 | 97  | 75  | 88  |
| 66                 | 078 | Wilcox  | 349  | 90  | 3840 | 140 | 75  | 98  |
| 67                 | 078 | Wilcox  | 627  | 112 | 2920 | 183 | 78  | 102 |
| 46                 | 081 | Wilcox  | 1138 | 34  | 119  | 9.6 | 92  | 92  |
| 23A08CD0002        | 087 | Miller  | 2185 | 658 | 248  | 46  | 105 | 104 |
| 01A08CD0078        | 087 | Miller  | 1112 | 249 | 122  | 21  | 110 | 104 |
| M111               | 106 | Gerding | 37   | 1   | 35   | 9.5 | 70  | 93  |
| M192               | 106 | Gerding | 32   | 11  | 51   | 4.6 | 75  | 105 |
| 173                | 106 | TGC     | 827  | 33  | 230  | 5.7 | 93  | 97  |
| 73                 | 106 | Wilcox  | 167  | 7   | 48   | 41  | 91  | 90  |
| 74                 | 106 | Wilcox  | 167  | 5   | 32   | 7.5 | 87  | 95  |
| 47                 | 198 | Wilcox  | 364  | 145 | 3130 | 429 | 87  | 82  |
| 48                 | 198 | Wilcox  | 333  | 82  | 4900 | 300 | 78  | 102 |
| M015               | 014 | Gerding | 47   | 18  | 108  | 31  | 80  | 100 |
| M121               | 014 | Gerding | 54   | 5   | 135  | 19  | 82  | 99  |
| 19A07CD0003        | 014 | Miller  | 165  | 95  | 183  | 31  | 80  | 92  |
| 20A10CD0007        | 014 | Miller  | 1032 | 413 | 53   | 9.4 | 99  | 90  |
| 123                | 014 | TGC     | 320  | 16  | 256  | 11  | 89  | 96  |
| 49                 | 014 | TGC     | 346  | 15  | 279  | 7.3 | 95  | 110 |
| DJNS 10-010        | Smz | Kato    | 85   | 27  | 89   | 8.2 | 81  | 106 |
| MRY 04-0409 (TR01) | Smz | Kato    | 499  | 36  | 37   | 11  | 88  | 91  |
| JND 12-006         | Smz | Kato    | 406  | 29  | 107  | 14  | 98  | 95  |
| JND 11-133         | Smz | Kato    | 585  | 39  | 73   | 27  | 90  | 98  |
| GAI 97660 (KO20)   | Smz | Kato    | 464  | 30  | 43   | 25  | 86  | 97  |
| JND 09-149         | Trf | Kato    | BLOQ | 74  | TTL  | 1.4 | N/D | 105 |
| DJNS 10-031        | Trf | Kato    | BLOQ | 52  | TTL  | 1.9 | N/D | 101 |
| DJNS 10-001        | Trf | Kato    | BLOQ | 93  | TTL  | 2.3 | N/D | 92  |
| DJNS 09-017        | Trf | Kato    | BLOQ | 62  | TTL  | 1.8 | N/D | 101 |
| TR15               | Trf | Kato    | BLOQ | 50  | TTL  | 2   | N/D | 92  |

<sup>a</sup>TTL = Toxin Too Low to evaluate

<sup>b</sup>N/D = Not determined

<sup>c</sup>BLOQ = Below Limit of Quantitation

**Suppl. Table 2** Predicted effects of TcdB amino acid differences on bezlotoxumab/TcdB binding

| <b>Ribotype</b> | <b>Residue change<sup>a</sup></b> | <b>Location</b> | <b>Impact<sup>b</sup></b> | <b>Predicted effect on Fab/TcdB binding</b>                                                                                                                      |
|-----------------|-----------------------------------|-----------------|---------------------------|------------------------------------------------------------------------------------------------------------------------------------------------------------------|
| <b>027</b>      | Ile1876Val                        | Epitope-1       | neg                       | Limited direct contact with Fab but may reduce favorable hydrophobic interactions within TcdB                                                                    |
|                 | Asp1939Gly                        | Epitope-1       | neg                       | Loss of interaction with Trp102 of Fab heavy chain                                                                                                               |
|                 | Gly1944Ala                        | Epitope-1       | neg                       | Introduces VDW clash at Tyr1905 of TcdB which may affect binding to Fab                                                                                          |
|                 | Val1946Ile                        | Epitope-1       | neg                       | Introduces VDW clash with Asn101 of Fab heavy chain                                                                                                              |
|                 | Pro1960Thr                        | Epitope-1       | neg                       | Introduces VDW clash within TcdB which combined with Val1946Ile causes steric clashes with Fab.                                                                  |
|                 | Glu1961Asp                        | Epitope-1       | neg                       | Weakens H-bond and hydrophobic interactions with Tyr32 of Fab heavy chain                                                                                        |
|                 | Val2007Ser                        | Epitope-2       | 0                         | Limited contact with Fab and no change to toxin structure                                                                                                        |
|                 | Glu2033Ala                        | Epitope-2       | neg                       | Loss of salt bridge with Arg59 and of favorable hydrophobic interactions with Trp33 of Fab heavy chain                                                           |
| <b>019</b>      | Same changes as 027               | See above       | See above                 | See above                                                                                                                                                        |
|                 | Gln1890Pro                        | Epitope-1       | 0                         | Limited contact with Fab and no change to toxin structure                                                                                                        |
| <b>036</b>      | Same changes as 027               | See above       | See above                 | See above                                                                                                                                                        |
|                 | Asp2093Asn                        | Epitope-2       | pos                       | Strengthens electrostatic interactions with Tyr32 of Fab heavy chain                                                                                             |
| <b>078</b>      | Phe1905Leu                        | Epitope-1       | neg                       | Introduces VDW clash with Asn101 of Fab heavy chain                                                                                                              |
|                 | Asp1939Glu                        | Epitope-1       | neg                       | Introduces VDW conflict with Trp102 of Fab heavy chain when combined with mutation Phe1905Leu .                                                                  |
|                 | Glu2033Ser                        | Epitope-2       | neg                       | Loss of salt bridge with Arg59 and of hydrophobic interactions with Trp33 of Fab heavy chain. This effect is less severe than Glu2033Ala change in 027 Ribotype. |
| <b>063</b>      | Same changes as 078               | See above       | See above                 | See above                                                                                                                                                        |
|                 | Tyr2009His                        | Epitope-2       | neg                       | Limited direct contact with Fab but may affect toxin stability through loss of H-bonds with Glu2053 and Asp2034                                                  |
| <b>017</b>      | Asp1939Glu                        | Epitope-1       | pos                       | Strengthens favorable polar interaction with Trp102 of Fab heavy chain                                                                                           |

<sup>a</sup>Compared with 087 TcdB sequence<sup>b</sup>0 = limited/none; neg = interferes with binding or stability; pos = favorable to binding or stability
